# Supplementary material for: Biobased dimethyl isosorbide as an efficient solvent for alkaline hydrolysis of waste polyethylene terephthalate to terephthalic acid
Source: Royal Society of Chemistry journal article supplement (doi:10.1039/d3gc02308g), 2023-01-01
Supplement: d3gc02308g1.pdf [file d3gc02308g1.pdf]

Electronic Supplementary Information  
For

**Biobased Dimethyl Isosorbide as an Efficient Solvent for Alkaline  
Hydrolysis Waste Polyethylene Terephthalate to Terephthalic Acid**

Haitao Yu,<sup>a</sup> Yang Wang,<sup>a</sup> Lan Chen,<sup>a</sup> Chenyang Wei,<sup>b</sup> Tiancheng Mu<sup>b</sup> and Zhimin Xue<sup>\*a</sup>

<sup>a</sup> Beijing Key Laboratory of Lignocellulosic Chemistry, Beijing Forestry University, Beijing, 100083, China. E-mail: zmxue@bjfu.edu.cn

<sup>b</sup> Department of Chemistry, Renmin University of China, Beijing, 100872, China

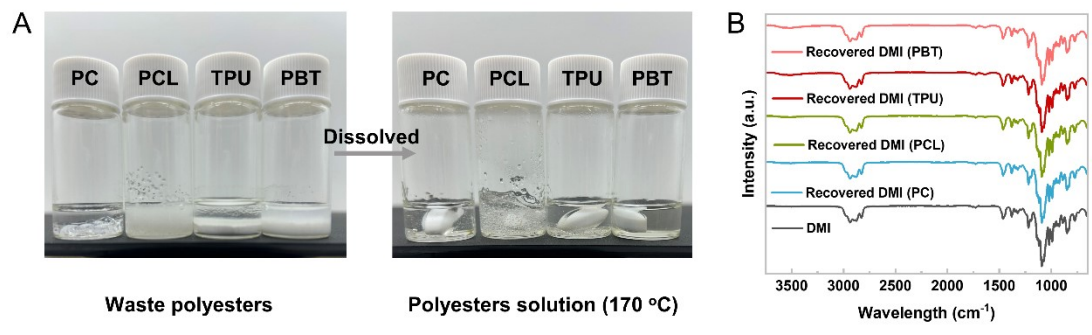

**Fig. S1.** The dissolution process of the PC, PCL, TPU, and PBT (A). ATR-FTIR spectra of the fresh DMI and the recovered DMI (B).

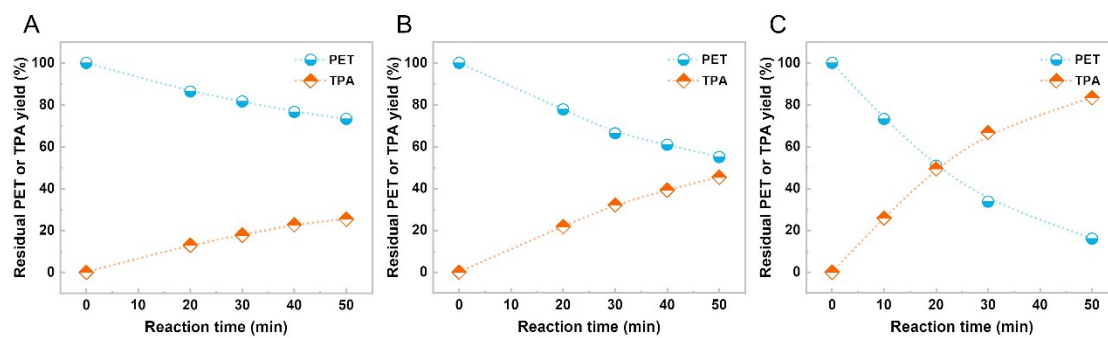

**Fig. S2.** Effect of reaction temperature on the alkaline hydrolysis of PET to generate TPA in DMI/EG mixed solvent. (A) 70 °C, (B) 80 °C, and (C) 90 °C. Reaction conditions: waste PET, 0.3 g; KOH, 0.5 g; DMI/EG (6:4, v:v) mixed solvents, 10 mL.

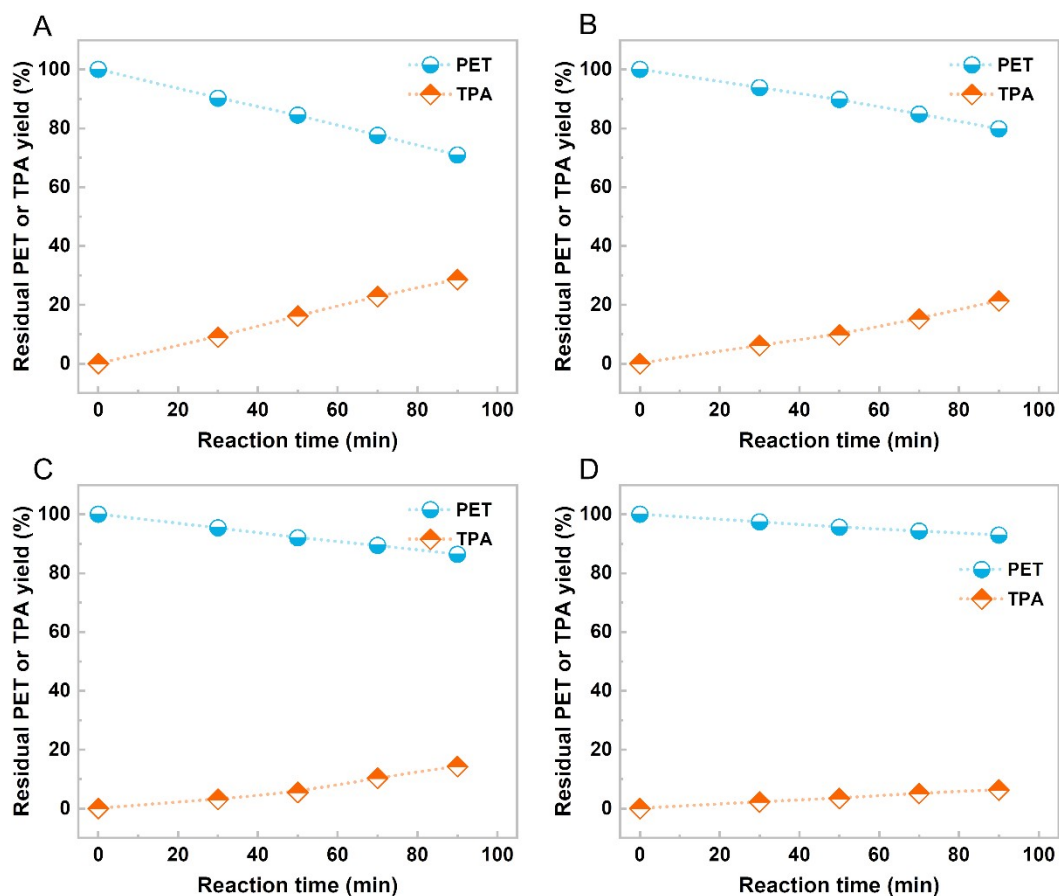

**Fig. S3.** Effect of reaction temperature on the alkaline hydrolysis of PET to generate TPA in pure EG. (A) 120 °C, (B) 110 °C, (C) 100 °C, and (D) 90 °C. Reaction conditions: waste PET, 0.3 g; KOH, 0.5 g; EG, 10 mL.

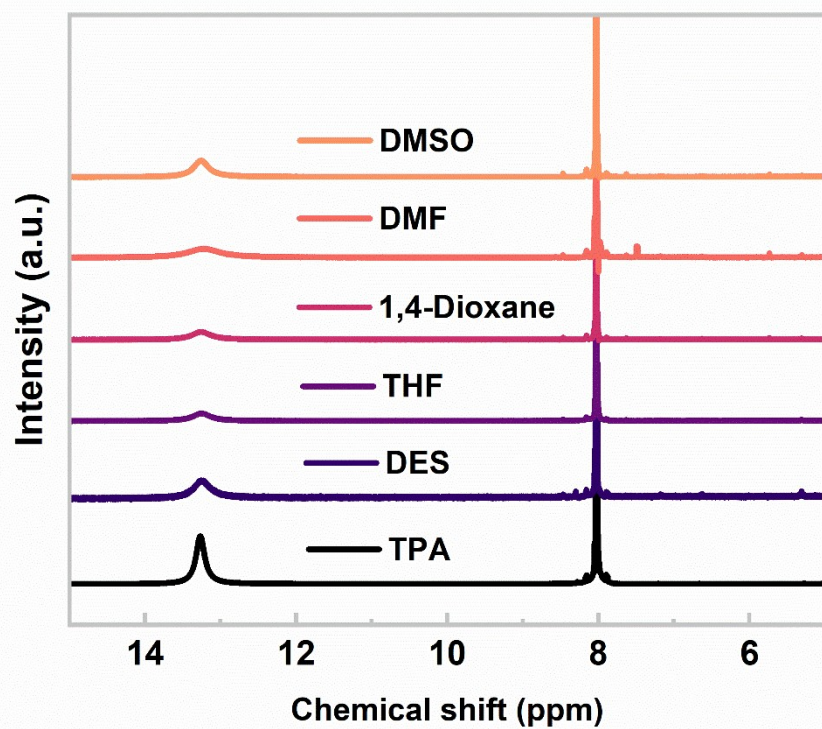

**Fig. S4.**  $^1\text{H}$  NMR spectra of the obtained TPA in various solvents.

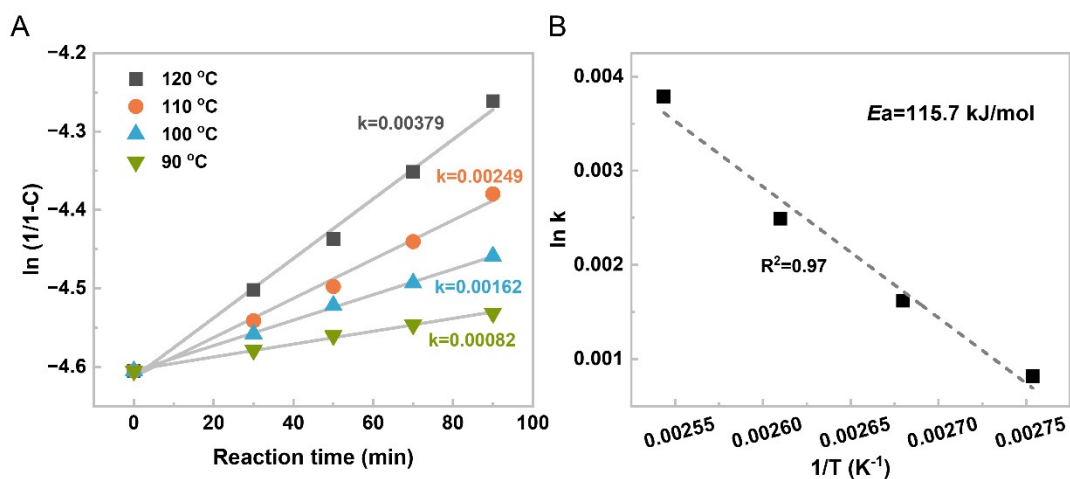

**Fig. S5.** First order kinetic curves (A) and the Arrhenius plot for the four temperatures studied in the PET conversion in pure EG (B). Reaction conditions: waste PET, 0.3 g; KOH, 0.5 g; pure EG, 10 mL.

**Table S1.** The intrinsic viscosities  $[\eta]$ , degradation ratio, and number-average molecular weight of waste PET and recycled PET with different solubility and temperatures.

| Samples               | $[\eta]$<br>(dL/g) <sup>a</sup> | Degradation ratio<br>(%) | Number-average<br>molecular weight ( $M_n$ ) |
|-----------------------|---------------------------------|--------------------------|----------------------------------------------|
| PET                   | 0.7627                          | -                        | 21676.5                                      |
| 160-0.25 <sup>b</sup> | 0.7448                          | 3.6                      | 20900.9                                      |
| 160-0.30              | 0.6856                          | 15.1                     | 18396.2                                      |
| 160-0.35              | 0.6499                          | 21.8                     | 16941.4                                      |
| 170-0.25              | 0.7493                          | 2.6                      | 21094.2                                      |
| 170-0.30              | 0.7484                          | 2.9                      | 21055.5                                      |
| 170-0.35              | 0.7104                          | 10.4                     | 19430.7                                      |

<sup>a</sup>The value of intrinsic viscosities of all samples was the average of three measurements. <sup>b</sup>160-0.25 represented the sample with a solubility of 0.25 g<sub>PET</sub>/g<sub>DMI</sub> at 160 °C.

**Table S2.** TGA results, DSC results, intrinsic viscosity, and number-average molecular weight of the original PET (*o*-PET) and the regenerated PET (*r*-PET).

|                   | $T_{max}$<br>(°C) | $T_{d5\%}$<br>(°C) | Ash<br>residue<br>rate<br>(%) | $T_c$<br>(°C) | $T_m$<br>(°C) | Melting<br>range<br>(°C) | $[\eta]$<br>(dL/g) | Degradation<br>ratio (%) | $M_n$ (g/mol) |
|-------------------|-------------------|--------------------|-------------------------------|---------------|---------------|--------------------------|--------------------|--------------------------|---------------|
| <i>o</i> -<br>PET | 439.8             | 400.2              | 11.0                          | 196.6         | 250.1         | 34.5                     | 0.763              |                          | 21676.5       |
| <i>r</i> -<br>PET | 438.7             | 397.8              | 10.8                          | 210.0         | 249.4         | 37.3                     | 0.948              | 2.9                      | 21055.5       |



**Table S3.** The solubility of other polyesters.

| Polyesters | Dissolution conditions | Solubility             |
|------------|------------------------|------------------------|
| PC         | 170 °C, 10 min         | 0.3 g g <sup>-1</sup>  |
| PCL        | 170 °C, 10 min         | 0.3 g g <sup>-1</sup>  |
| TPU        | 170 °C, 10 min         | 0.3 g g <sup>-1</sup>  |
| PBT        | 170 °C, 10 min         | 0.25 g g <sup>-1</sup> |

**Table S4.** Comparison of the cost of different bio-based solvents. <sup>a</sup>

| Solvents | Price            | Item No.     | Manufacturers   |
|----------|------------------|--------------|-----------------|
| GVL      | 119.00 (500 g)   | A020399      | Energy Chemical |
| Cyrene   | 258.00 (500 g)   | D070287      | Energy Chemical |
| DMI      | 1460.42 (100 mL) | 807796-100ML | Sigma-Aldrich   |

<sup>a</sup>All data originate from <https://www.energy-chemical.com/> and <https://www.sigmaaldrich.cn/CN/zh>. (accessed August 2023)

**Table S5.** Linear regression results for the data in Fig. S5A and B.

| Temperature (°C) | Rate constant ( <i>k</i> ) | R <sup>2</sup> | <i>E<sub>a</sub></i> (kJ/mol) | R <sup>2</sup> |
|------------------|----------------------------|----------------|-------------------------------|----------------|
| 120              | 0.00379                    | 0.99473        |                               |                |
| 110              | 0.00249                    | 0.99216        | 115.7                         | 0.97994        |
| 100              | 0.00162                    | 0.99924        |                               |                |
| 90               | 0.00082                    | 0.99658        |                               |                |

**Table S6.** Linear regression results for the data in Fig. 4D and E.

| Temperature (°C) | Rate constant ( <i>k</i> ) | R <sup>2</sup> | <i>E<sub>a</sub></i> (kJ/mol) | R <sup>2</sup> |
|------------------|----------------------------|----------------|-------------------------------|----------------|
| 100              | 0.10755                    | 0.99607        |                               |                |
| 90               | 0.03711                    | 0.9985         | 102.5                         | 0.98315        |
| 80               | 0.01210                    | 0.99218        |                               |                |
| 70               | 0.00626                    | 0.99243        |                               |                |
